# Supplementary figures and images for: CYBA C242T polymorphism is a risk factor for pre-eclampsia:a case control study
Source: Research Square preprint supplement (doi:10.21203/rs.3.rs-1404589/v1), 2022-03-23

**CYBA D1-D3 C1-C3**


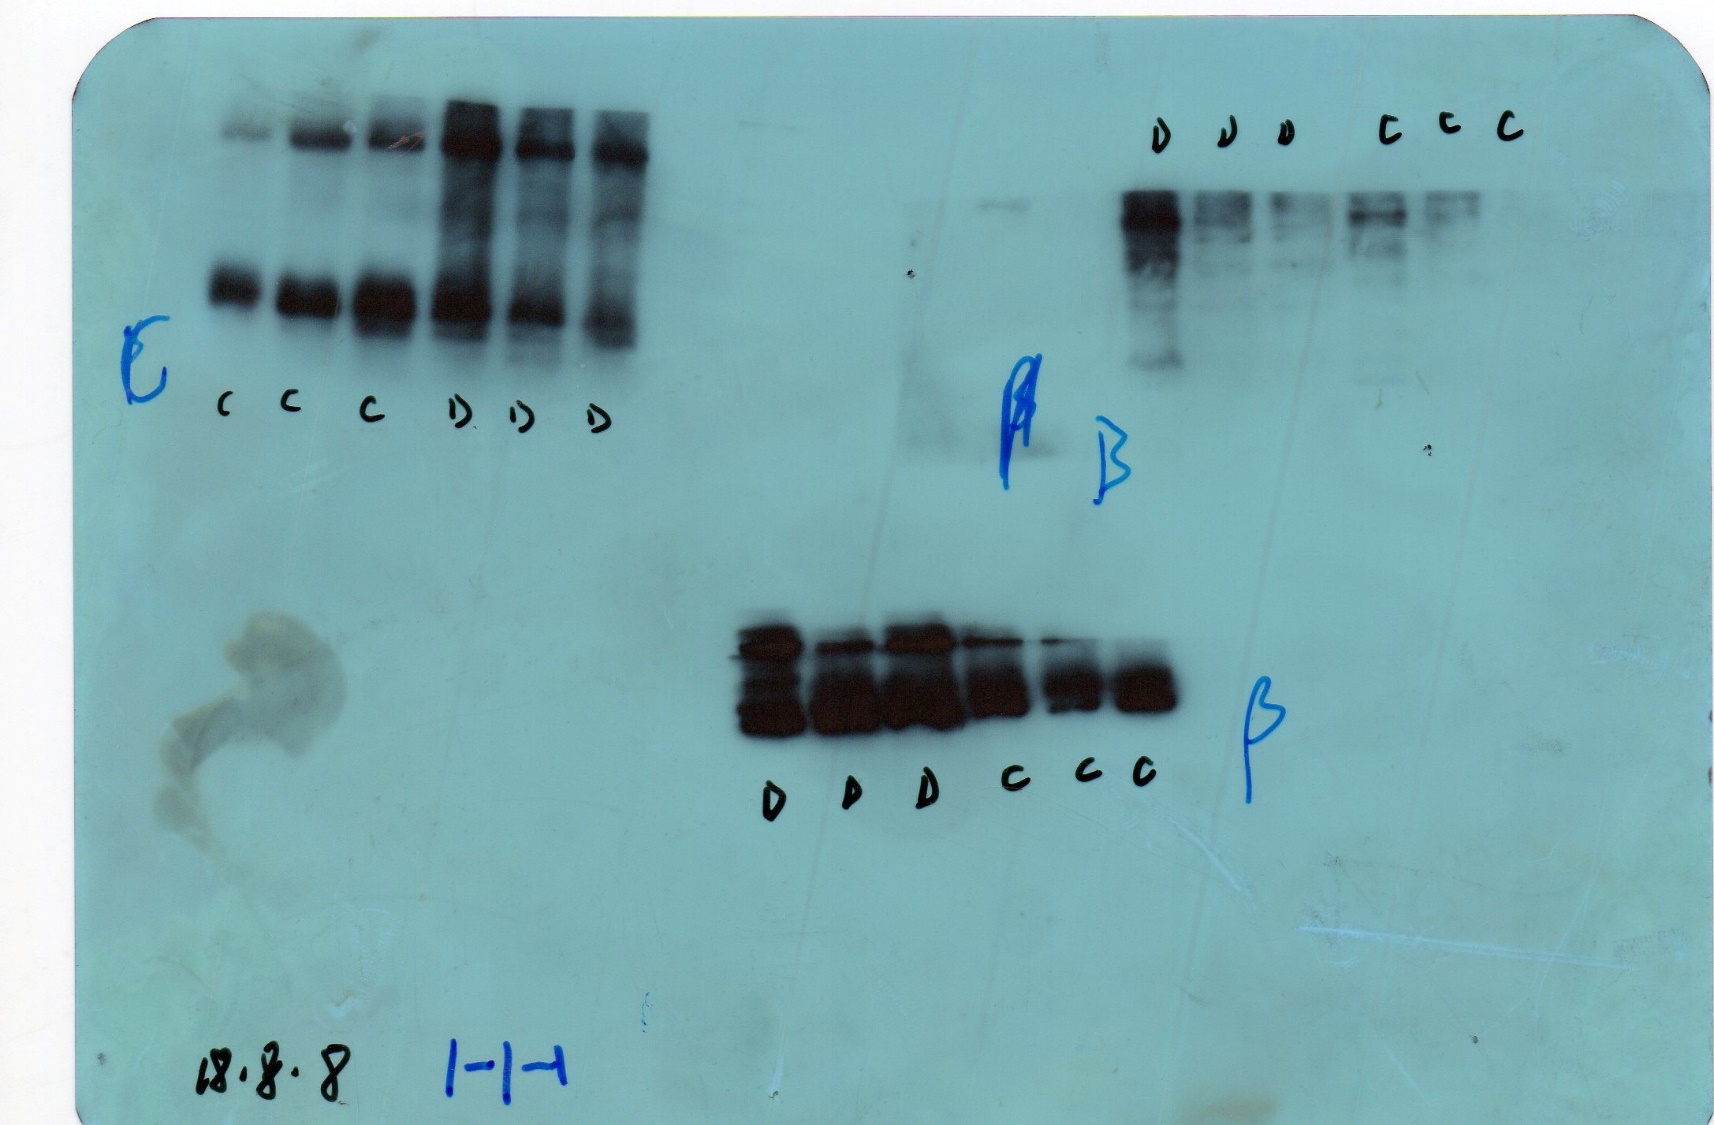


**CYBA D4-D6 C4-C6**


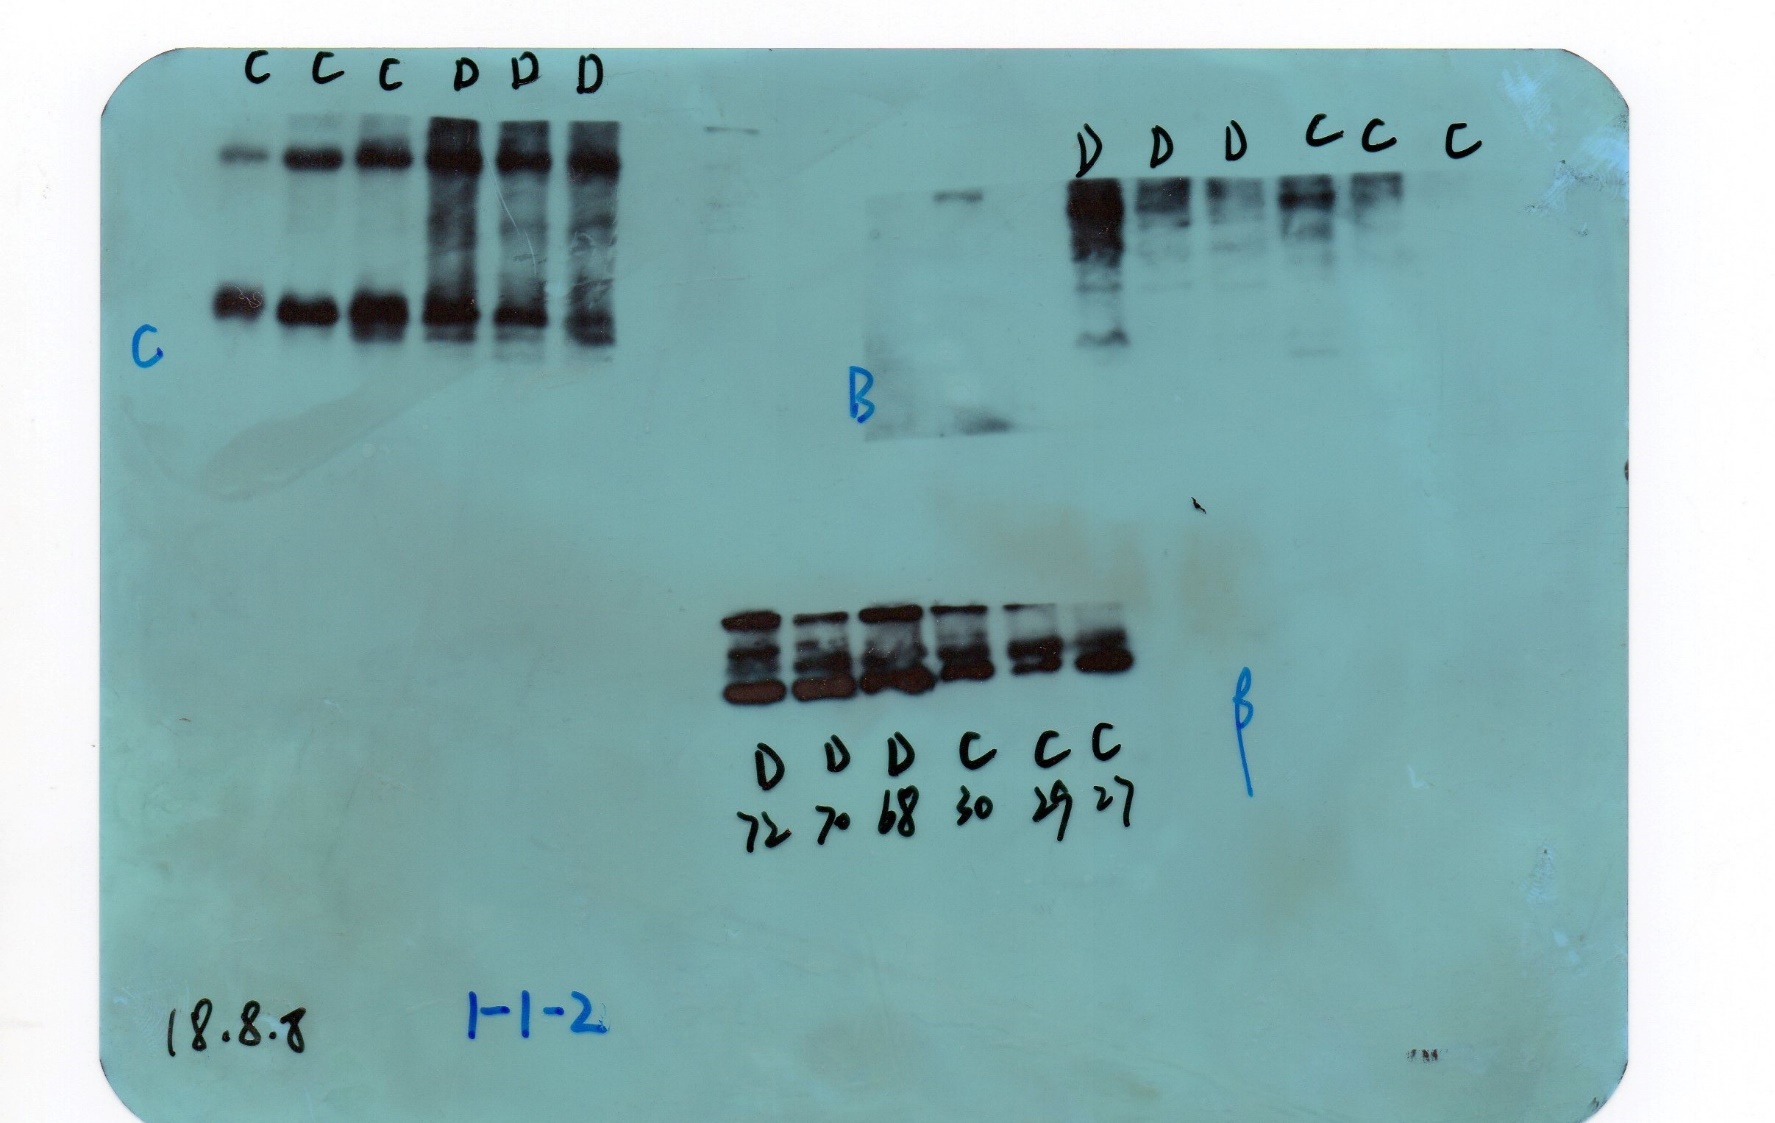


**CYBA D7-D9 C7-C9**


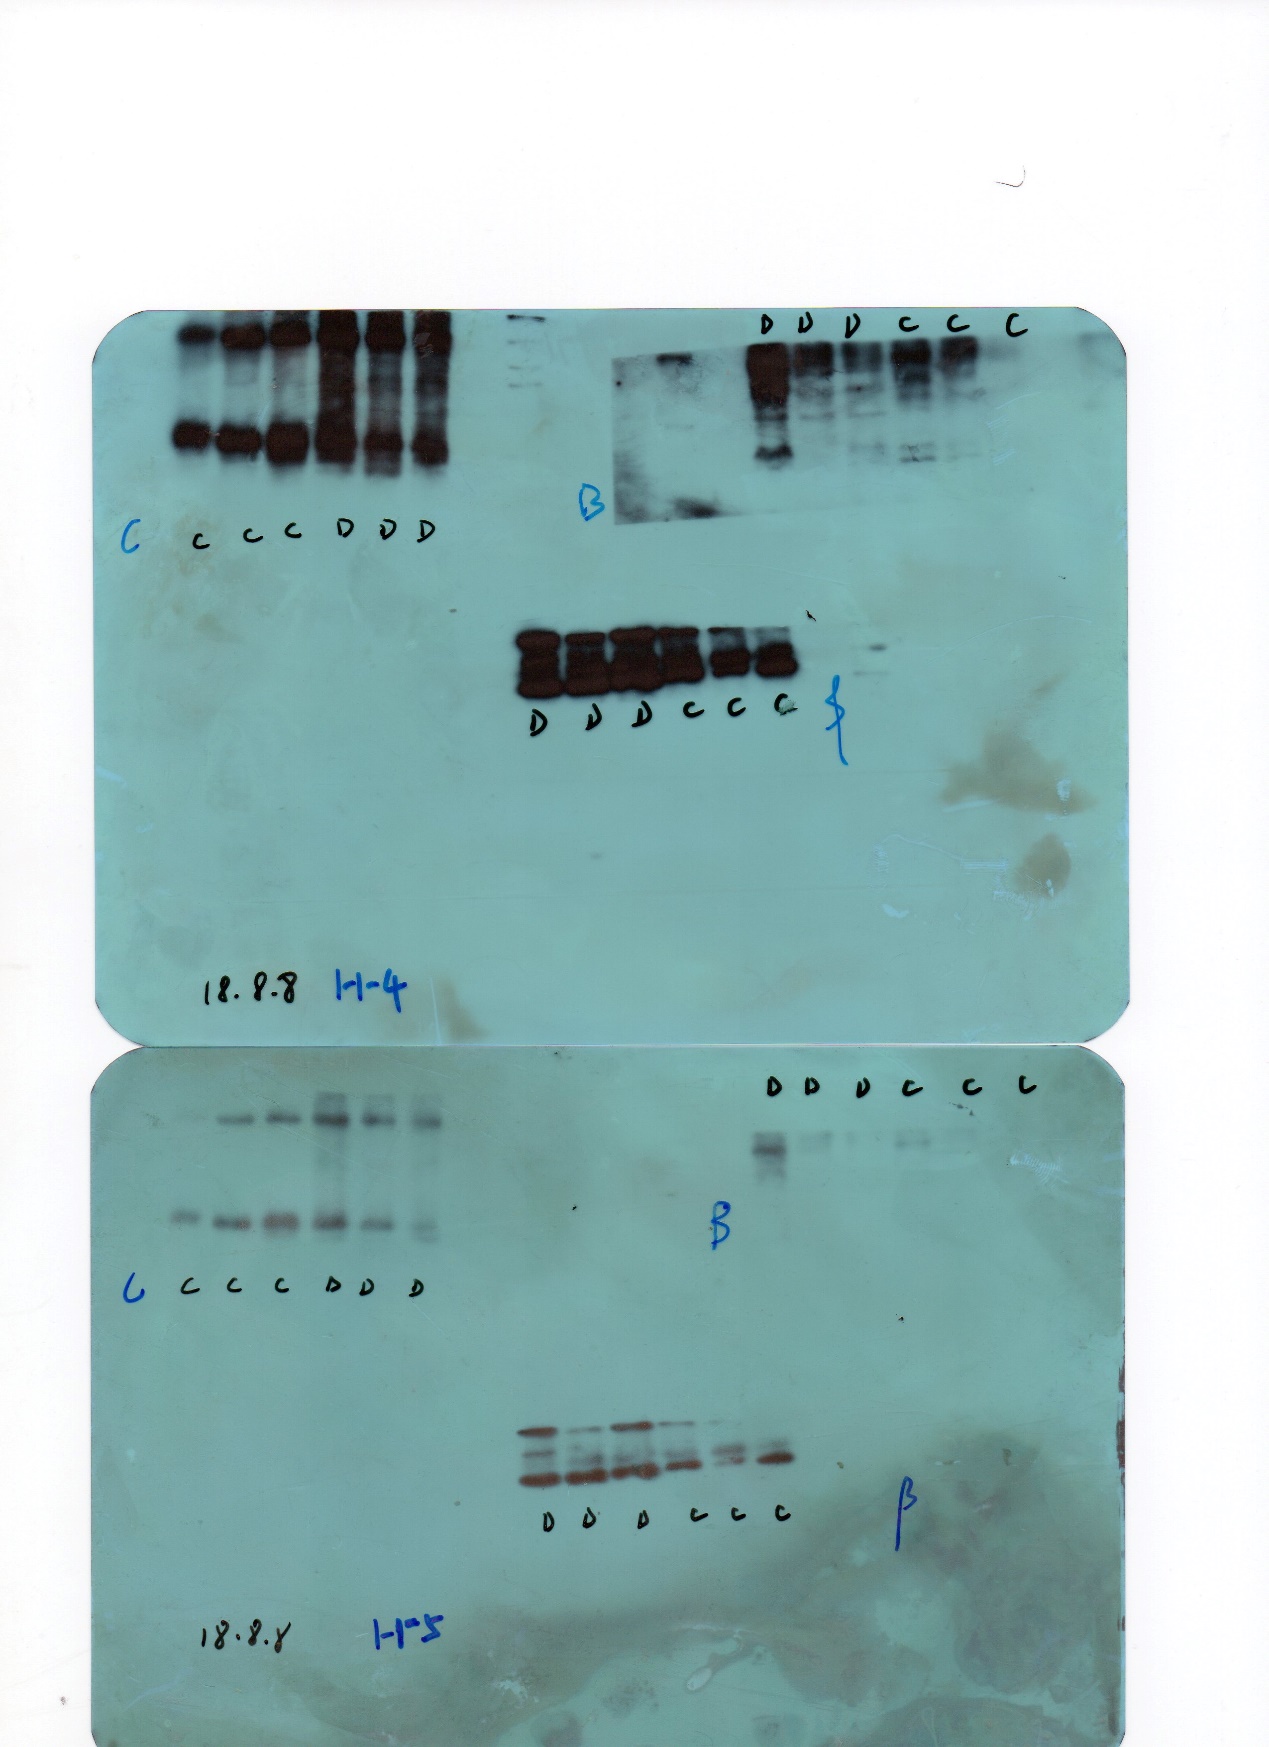


**CYBA D10-D12 C10-C12**


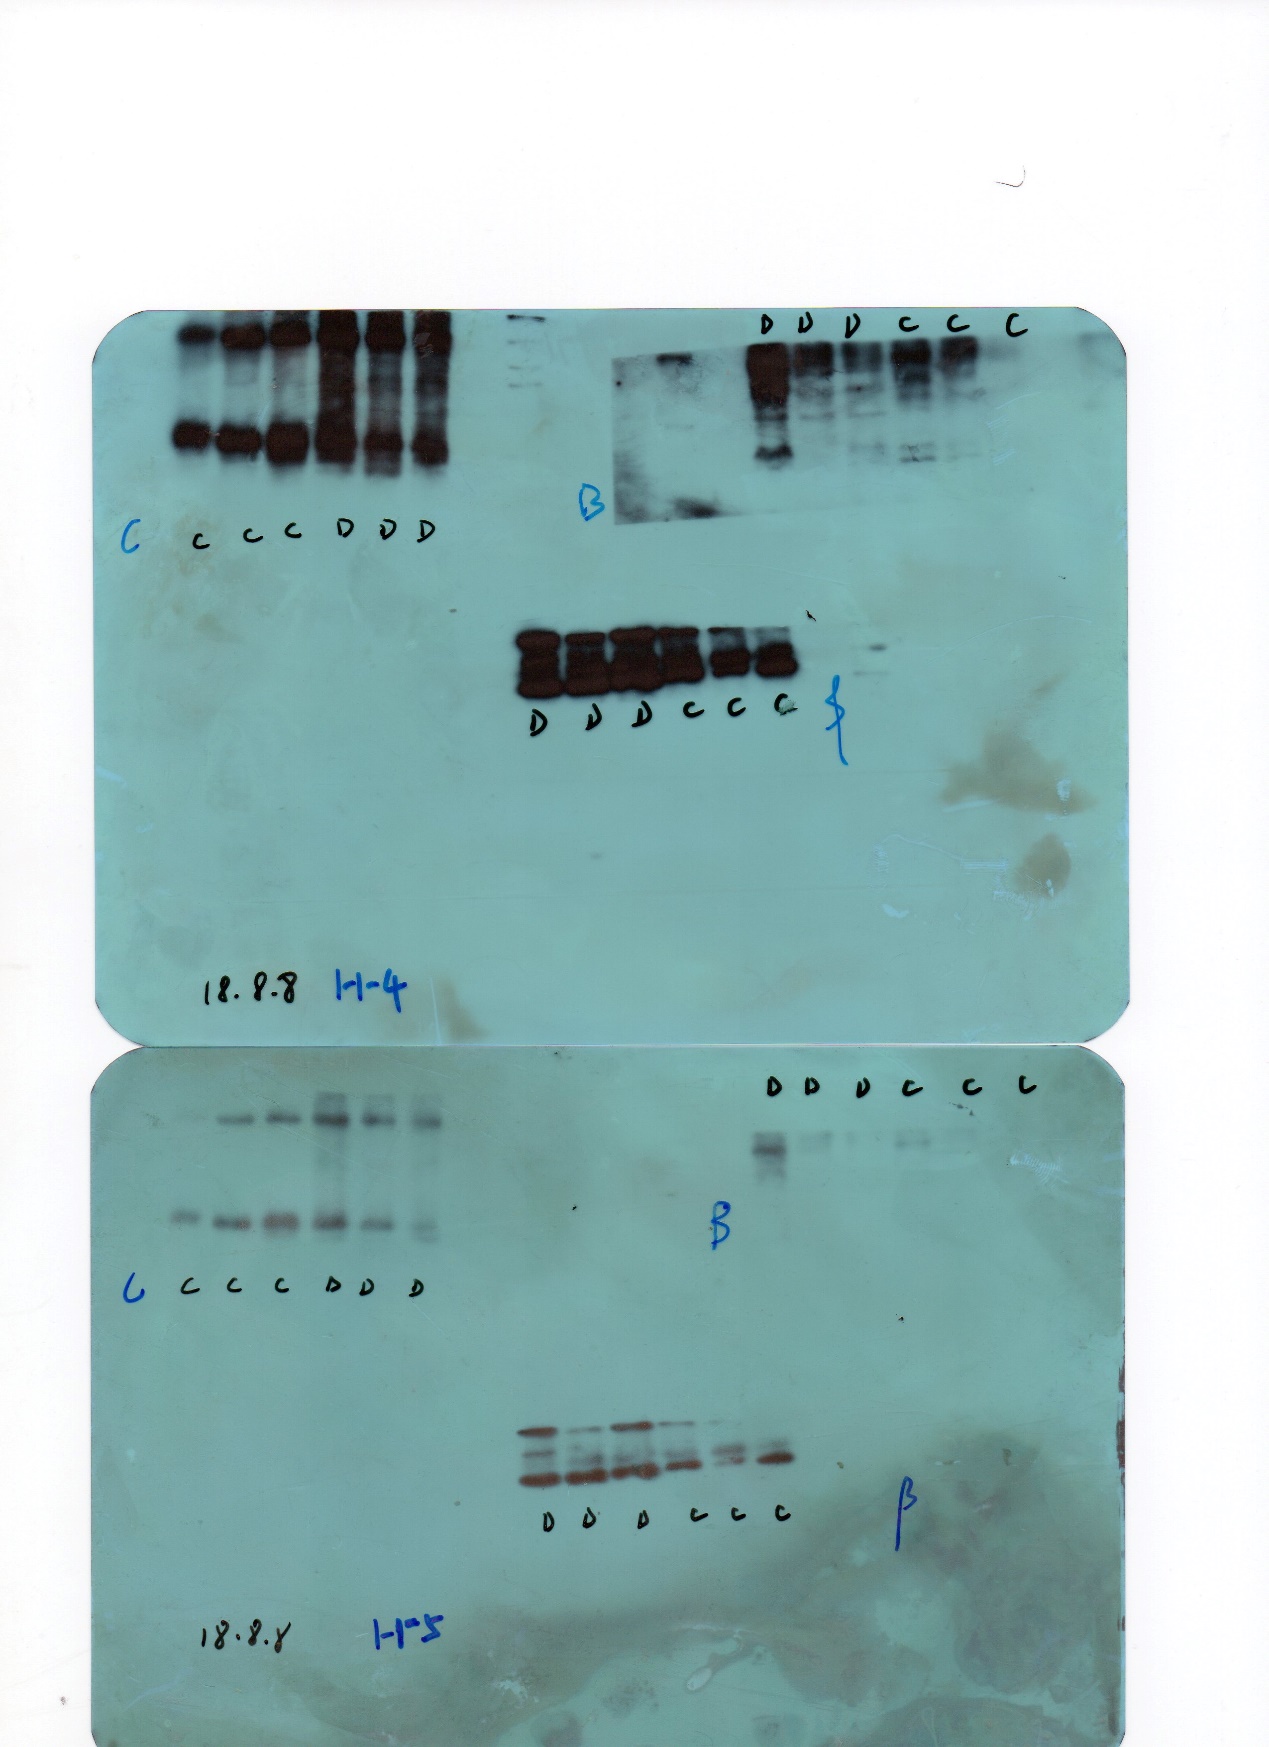


**CYBA D13-D15 C13-C15**


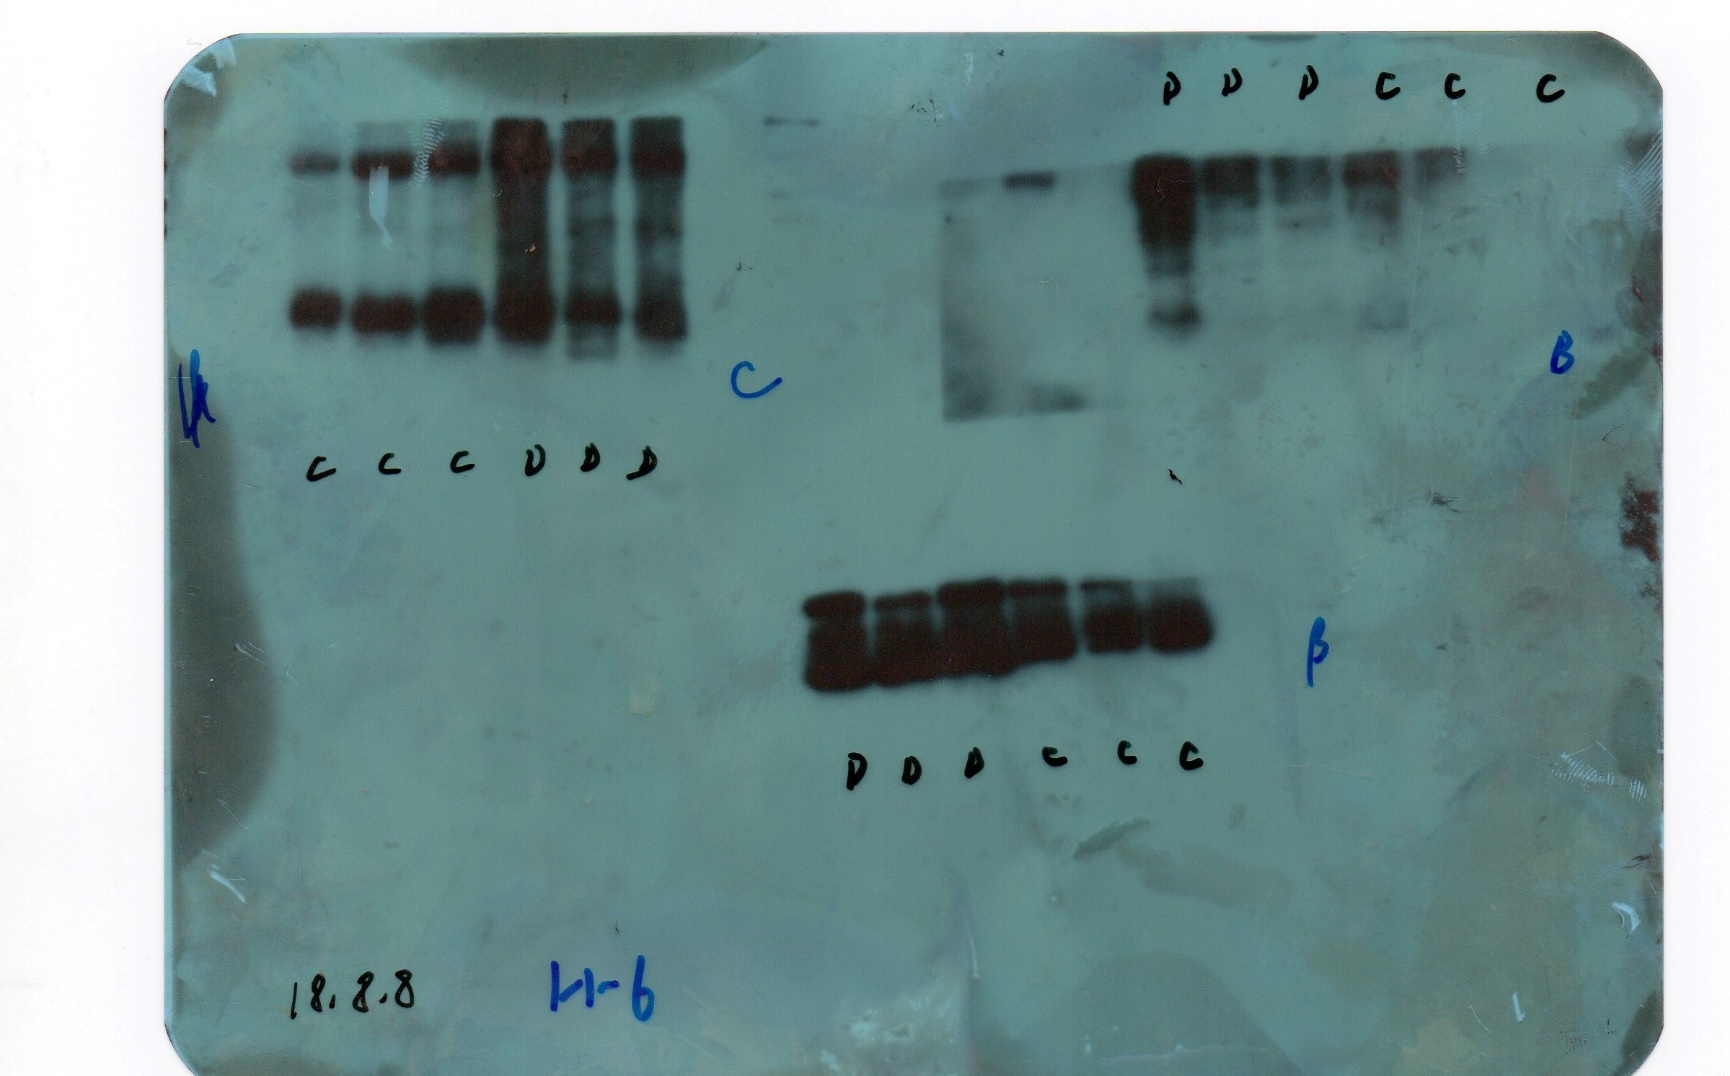


**CYBA D16-D18 C16-C18**


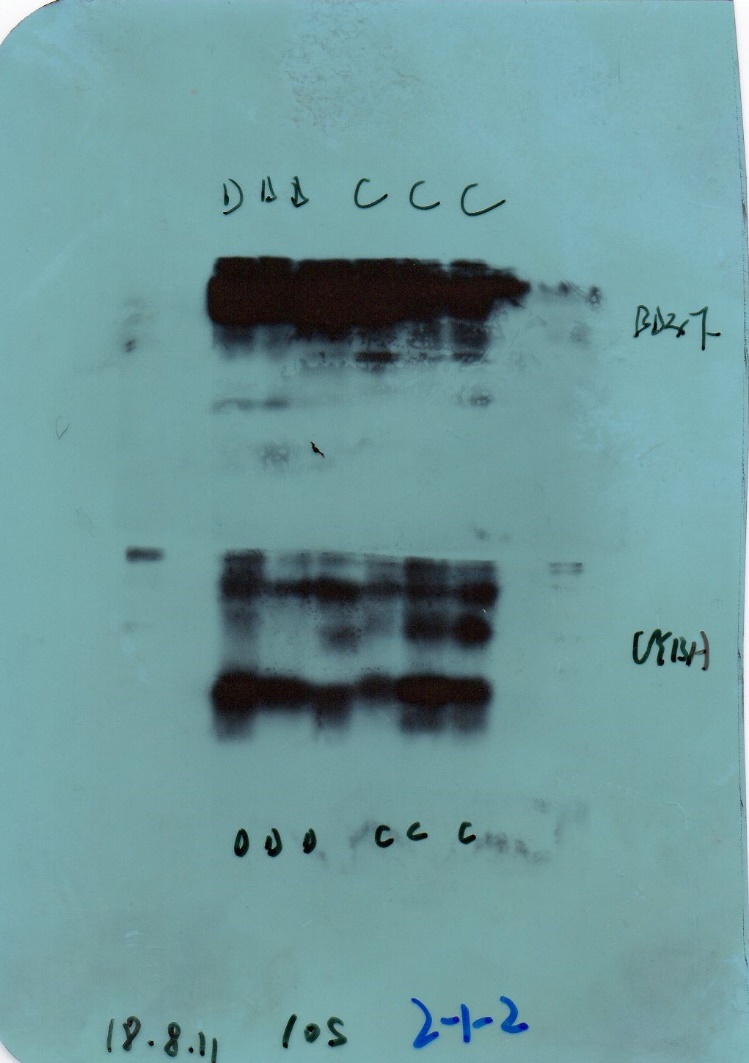


**CYBA D19-D21 C19-C21**


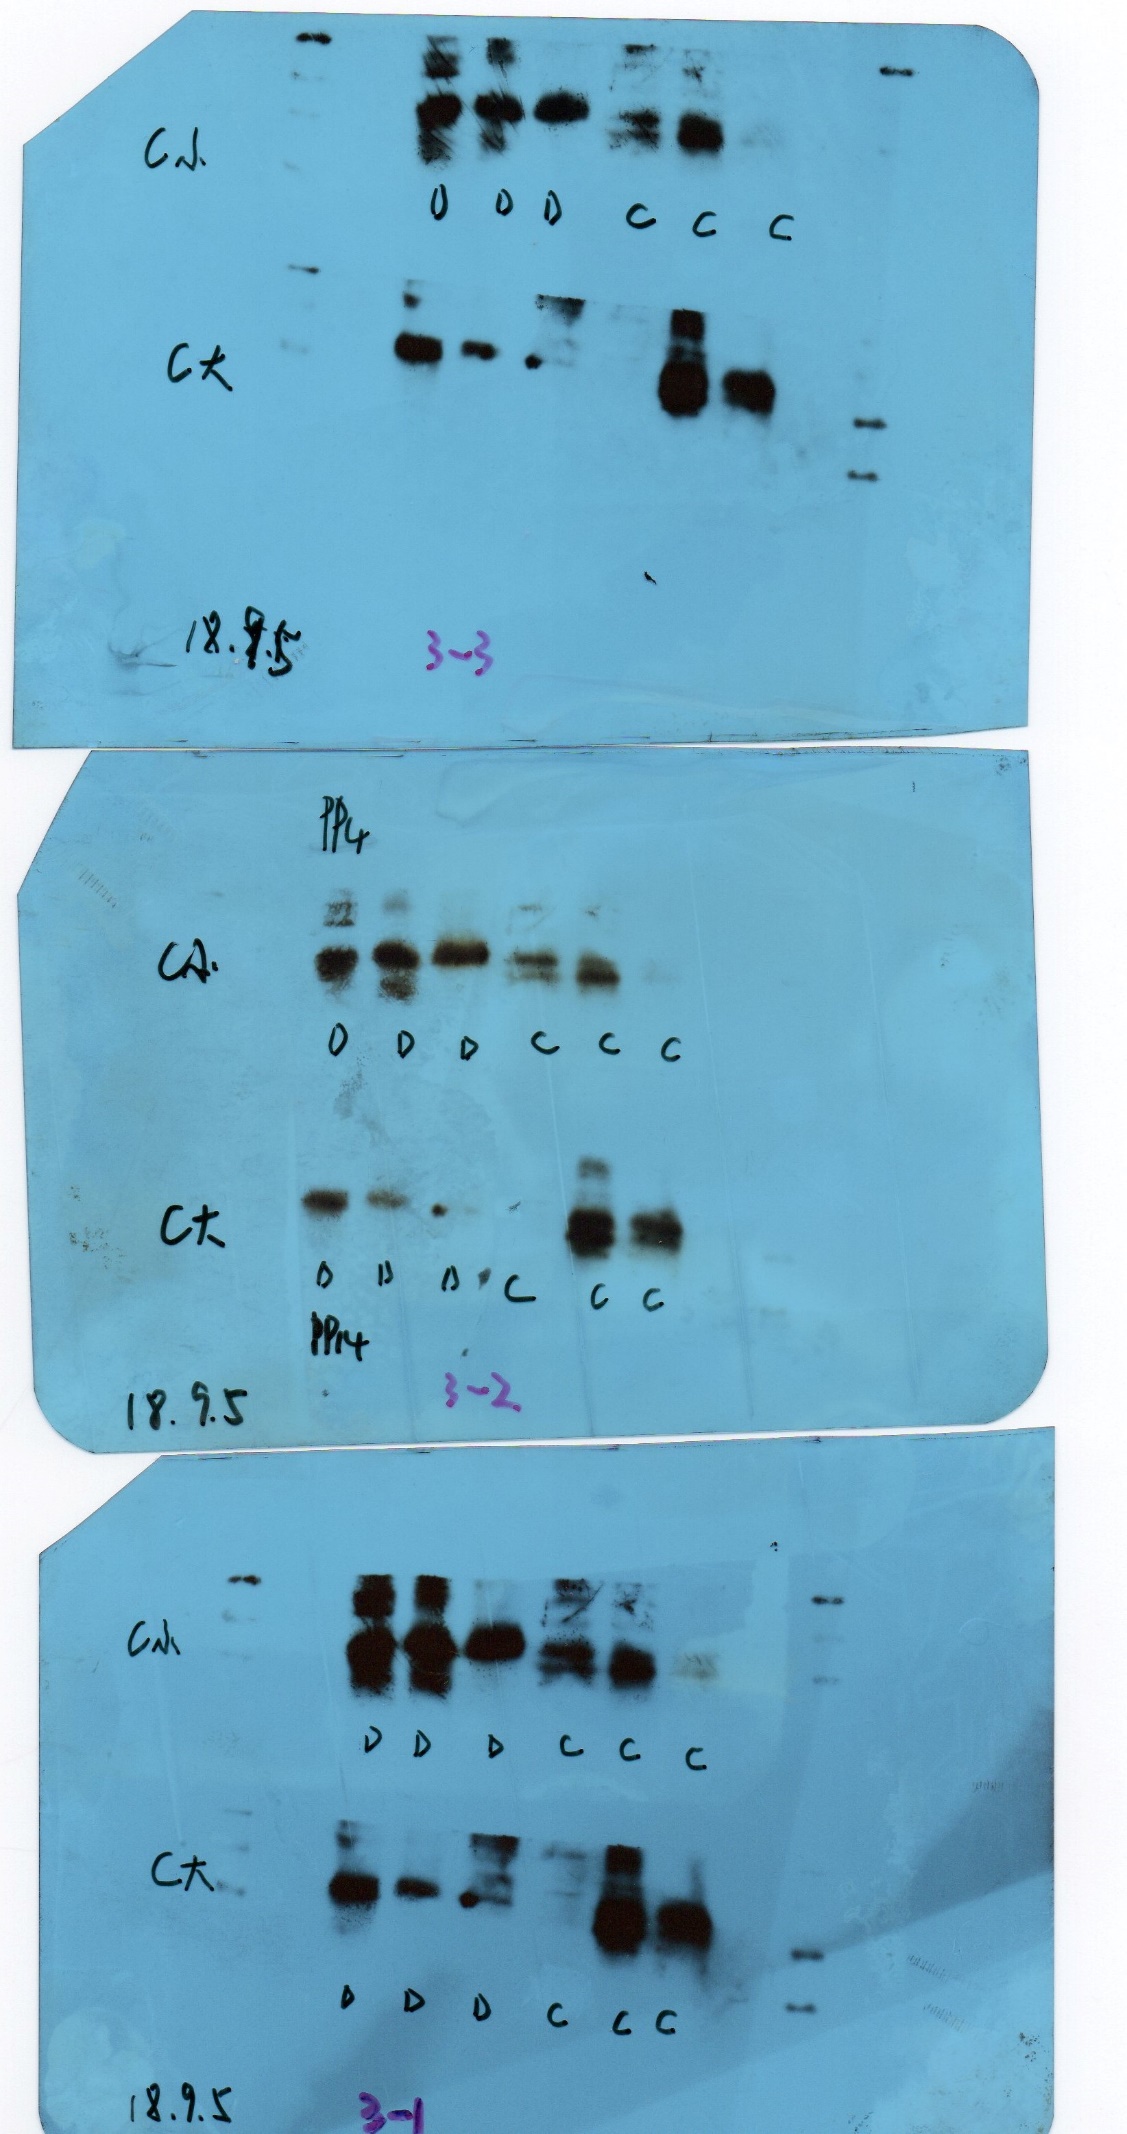

Supplement: Supplementary file 1 [file 5bd11d7aba9fa5041d3254be.docx]
